# Supplementary material for: Evaluation of Hepatic Detoxification Effects of Enteromorpha prolifera Polysaccharides against Aflatoxin B1 in Broiler Chickens
Source: MDPI journal article supplement (doi:10.3390/antiox11091757), 2022-09-06
Supplement: s1 [file s1]

**Table S1.** The chemical and monosaccharide composition of seaweed-derived polysaccharides (SDP) from *Enteromorpha prolifera*.

| Items                                     | Contents, % |
|-------------------------------------------|-------------|
| <b>Chemical composition</b>               |             |
| Total polysaccharides                     | 53.32       |
| Protein                                   | 1.65        |
| Sulfate                                   | 19.87       |
| Uronic acid                               | 12.66       |
| Moisture                                  | 3.58        |
| Unspecified compounds (lipid, salt, etc.) | 8.92        |
| <b>Monosaccharide composition</b>         |             |
| Glucosamine (GlcN)                        | 50.81       |
| Glucose (Glc)                             | 27.70       |
| Galacturonic acid (GalA)                  | 11.75       |
| Mannose (Man)                             | 2.78        |
| Xylose (Xyl)                              | 2.63        |
| Galactose (Gal)                           | 1.95        |
| Arabinose (Ara)                           | 0.93        |
| Glucuronic acid (GlcA)                    | 0.76        |
| Fucose (Fuc)                              | 0.27        |
| Galactosamine (GalN)                      | 0.25        |
| Ribose (Rib)                              | 0.17        |

A phenol-sulfuric acid assay was used to determine the total polysaccharide content and Glc was used as a standard. Bradford's method was used to analysis the protein content and bovine serum albumin (BSA) was used as a standard. The barium sulfate-gelatin turbidimetric method was used to determine the sulfate content and potassium sulfate was used as a standard. m-Hydroxybiphenyl colorimetry was used to measure uronic acid content and d-GlcA was used as a standard. Monosaccharide composition was determined using high-performance liquid chromatography (HPLC).
