# Supplementary material for: Evaluation of Hepatic Detoxification Effects of Enteromorpha prolifera Polysaccharides against Aflatoxin B1 in Broiler Chickens
Source: MDPI journal article supplement (doi:10.3390/antiox11091757), 2022-09-06
Supplement: s1 [file s1]

**Table S2.** The formulation and nutrient levels of the basal diet.

| Item                               | Contents (%) |
|------------------------------------|--------------|
| <b>Ingredients</b>                 |              |
| Corn                               | 60.84        |
| Soybean meal                       | 32.11        |
| Wheat bran                         | 2.16         |
| Soybean oil                        | 2.00         |
| Limestone                          | 1.28         |
| CaHPO <sub>4</sub>                 | 1.26         |
| DL-Methionine                      | 0.15         |
| Vitamin premix <sup>1</sup>        | 0.10         |
| Mineral premix <sup>2</sup>        | 0.10         |
| Total                              | 100.00       |
| <b>Nutrient levels<sup>3</sup></b> |              |
| ME (MJ/kg)                         | 11.94        |
| Crude protein (%)                  | 18.22        |
| Ca (%)                             | 0.98         |
| Met (%)                            | 0.32         |
| Cystine (%)                        | 0.31         |
| Lys (%)                            | 0.90         |
| Total phosphorus (%)               | 0.51         |

<sup>1</sup>Premix provided per kilogram of diet: 5,000 IU of vitamin A, 1000 IU of vitamin D<sub>3</sub>, 10 IU of vitamin E, 0.5 mg of vitamin K<sub>3</sub>, 3 mg of thiamin, 7.5 mg of riboflavin, 4.5 mg of vitamin B<sub>6</sub>, 10 µg of vitamin B<sub>12</sub>, 25 mg of niacin, 0.55 mg of folic acid, 0.2 mg of biotin, 500 mg of choline, and 10.5 mg of pantothenic acid.

<sup>2</sup>Premix provided per kilogram of diet: 60 mg of Zn, 80 mg of Mn, 80 mg of Fe, 3.75 mg of Cu, 0.35 mg of I, and 0.15 mg of Se.

<sup>3</sup>Except for metabolic energy (ME), others are measured values.
